# Supplementary material
Source: PubMed Central journal article supplement (PMC3303952)
Supplement: NIHMS348097-supplement-1.pdf [file NIHMS348097-supplement-1.pdf]

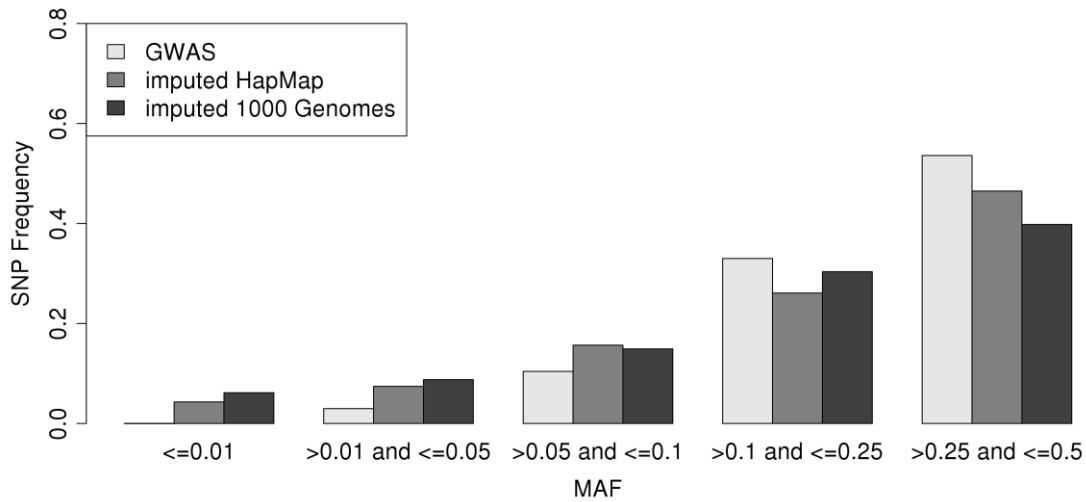

Supplemental Fig 1 MAF distribution of GWAS and imputed SNPs from the entire imputation region ( $\pm 200$  kb flanking the gene sequence) for all six candidate genes. The poor representation of MAF values  $< 0.05$  for the GWAS data was expected because the GWAS platform was designed to query MAF values of 0.05 or greater.

Supplemental Table 1. Number of tag SNPs from the original study that were either genotyped on the GWAS platform or imputed.

| <b>Gene</b>  | <b>tSNPs</b> | <b>GWAS SNPs</b> | <b>HapMap<br/>imputed SNPs</b> | <b>“1000 Genomes”<br/>imputed SNPs</b> |
|--------------|--------------|------------------|--------------------------------|----------------------------------------|
| GLDC         | 76           | 29               | 35                             | 45                                     |
| AMT          | 2            | 0                | 2                              | 2                                      |
| DLD          | 12           | 3                | 8                              | 9                                      |
| GCSH         | 15           | 4                | 10                             | 11                                     |
| SHMT1        | 19           | 4                | 10                             | 14                                     |
| SHMT2        | 7            | 2                | 0                              | 5                                      |
| <b>Total</b> | <b>131</b>   | <b>42</b>        | <b>65</b>                      | <b>86</b>                              |

Supplemental Table 2. MAF distributions for all SNPs within the six genes that were previously genotyped as a tag SNP and were either on the GWAS panel or were imputed.

| <b>MAF</b>       | <b>GWAS</b> | <b>imputed HapMap</b> | <b>imputed "1000 Genomes"</b> | <b>tag SNPs</b> |
|------------------|-------------|-----------------------|-------------------------------|-----------------|
| > 0.01 and ≤0.05 | 0           | 1                     | 3                             | 3               |
| > 0.05 and ≤0.1  | 2           | 5                     | 6                             | 8               |
| > 0.1 and ≤0.25  | 16          | 18                    | 26                            | 42              |
| > 0.25 and ≤0.5  | 24          | 41                    | 51                            | 78              |
| <b>Total</b>     | <b>42</b>   | <b>65</b>             | <b>86</b>                     | <b>131</b>      |
